# Supplementary material for: Novel Acinetobacter baumannii Bacteriophage Aristophanes Encoding Structural Polysaccharide Deacetylase
Source: MDPI journal article supplement (doi:10.3390/v13091688), 2021-08-26
Supplement: s1 [file s1]

## Supplementary Materials

**Table S1.** Functional assignments of *Acinetobacter* phage Aristophanes genes.

| №  | product                                 | Start | End   | Length | Direction | locus tag          |
|----|-----------------------------------------|-------|-------|--------|-----------|--------------------|
| 1  | hypothetical protein                    | 1429  | 1590  | 162    | forward   | Aristophanes_00001 |
| 2  | hypothetical protein                    | 1658  | 2176  | 519    | forward   | Aristophanes_00002 |
| 3  | hypothetical protein                    | 2176  | 2424  | 249    | forward   | Aristophanes_00003 |
| 4  | hypothetical protein                    | 2496  | 3110  | 615    | forward   | Aristophanes_00004 |
| 5  | hypothetical protein                    | 3151  | 3291  | 141    | forward   | Aristophanes_00005 |
| 6  | hypothetical protein                    | 3304  | 3567  | 264    | forward   | Aristophanes_00006 |
| 7  | hypothetical protein                    | 3577  | 4140  | 564    | forward   | Aristophanes_00007 |
| 8  | hypothetical protein                    | 4142  | 4393  | 252    | forward   | Aristophanes_00008 |
| 9  | hypothetical protein                    | 4390  | 4614  | 225    | forward   | Aristophanes_00009 |
| 10 | DNA primase/helicase                    | 4618  | 5418  | 801    | forward   | Aristophanes_00010 |
| 11 | hypothetical protein                    | 5403  | 5675  | 273    | forward   | Aristophanes_00011 |
| 12 | hypothetical protein                    | 5672  | 5938  | 267    | forward   | Aristophanes_00012 |
| 13 | hypothetical protein                    | 5935  | 6189  | 255    | forward   | Aristophanes_00013 |
| 14 | replicative DNA helicase                | 6196  | 7482  | 1287   | forward   | Aristophanes_00014 |
| 15 | hypothetical protein                    | 7485  | 7877  | 393    | forward   | Aristophanes_00015 |
| 16 | putative DNA polymerase                 | 8051  | 10378 | 2328   | forward   | Aristophanes_00016 |
| 17 | hypothetical protein                    | 10532 | 10666 | 135    | forward   | Aristophanes_00017 |
| 18 | hypothetical protein                    | 10677 | 11471 | 795    | forward   | Aristophanes_00018 |
| 19 | putative 5'-3' exonuclease              | 11632 | 12582 | 951    | forward   | Aristophanes_00019 |
| 20 | hypothetical protein                    | 12572 | 12640 | 69     | forward   | Aristophanes_00020 |
| 21 | recombination endonuclease VII          | 12637 | 13080 | 444    | forward   | Aristophanes_00021 |
| 22 | thymidylate synthase                    | 13073 | 13729 | 657    | forward   | Aristophanes_00022 |
| 23 | ribonucleotide reductase, small subunit | 13716 | 14729 | 1014   | forward   | Aristophanes_00023 |
| 24 | hypothetical protein                    | 14731 | 14922 | 192    | forward   | Aristophanes_00024 |
| 25 | ribonucleotide reductase, large subunit | 14915 | 16615 | 1701   | forward   | Aristophanes_00025 |
| 26 | putative phosphodiesterase              | 16702 | 17664 | 963    | forward   | Aristophanes_00026 |
| 27 | dNMP kinase                             | 17661 | 18326 | 666    | forward   | Aristophanes_00027 |
| 28 | putative DNA-dependent RNA polymerase   | 18335 | 20761 | 2427   | forward   | Aristophanes_00028 |
| 29 | hypothetical protein                    | 20841 | 21062 | 222    | forward   | Aristophanes_00029 |
| 30 | hypothetical protein                    | 21063 | 21317 | 255    | forward   | Aristophanes_00030 |
| 31 | hypothetical protein                    | 21314 | 21649 | 336    | forward   | Aristophanes_00031 |
| 32 | putative head-tail connector protein    | 21659 | 23203 | 1545   | forward   | Aristophanes_00032 |
| 33 | putative capsid scaffold protein        | 23203 | 24039 | 837    | forward   | Aristophanes_00033 |
| 34 | putative capsid protein                 | 24094 | 25137 | 1044   | forward   | Aristophanes_00034 |
| 35 | hypothetical protein                    | 25187 | 25348 | 162    | forward   | Aristophanes_00035 |
| 36 | tail tubular protein A                  | 25443 | 26006 | 564    | forward   | Aristophanes_00036 |
| 37 | tail tubular protein B                  | 26022 | 28814 | 2793   | forward   | Aristophanes_00037 |
| 38 | internal virion protein A               | 28815 | 29516 | 702    | forward   | Aristophanes_00038 |

|    |                                    |       |       |      |         |                    |
|----|------------------------------------|-------|-------|------|---------|--------------------|
| 39 | putative internal virion protein B | 29527 | 32418 | 2892 | forward | Aristophanes_00039 |
| 40 | putative internal virion protein C | 32429 | 36613 | 4185 | forward | Aristophanes_00040 |
| 41 | tailspike protein                  | 36615 | 39596 | 2982 | forward | Aristophanes_00042 |
| 42 | putative holin                     | 39697 | 40080 | 384  | forward | Aristophanes_00043 |
| 43 | endolysin                          | 40049 | 40636 | 588  | forward | Aristophanes_00044 |
| 44 | putative DNA maturase subunit A    | 40639 | 40941 | 303  | forward | Aristophanes_00045 |
| 45 | putative DNA maturase subunit B    | 40950 | 42902 | 1953 | forward | Aristophanes_00046 |
| 46 | hypothetical protein               | 42889 | 43113 | 225  | forward | Aristophanes_00047 |

**Figure S1.** VIRIDIC generated heatmap of 85 representatives of all genera of the family *Autographiviridae*.

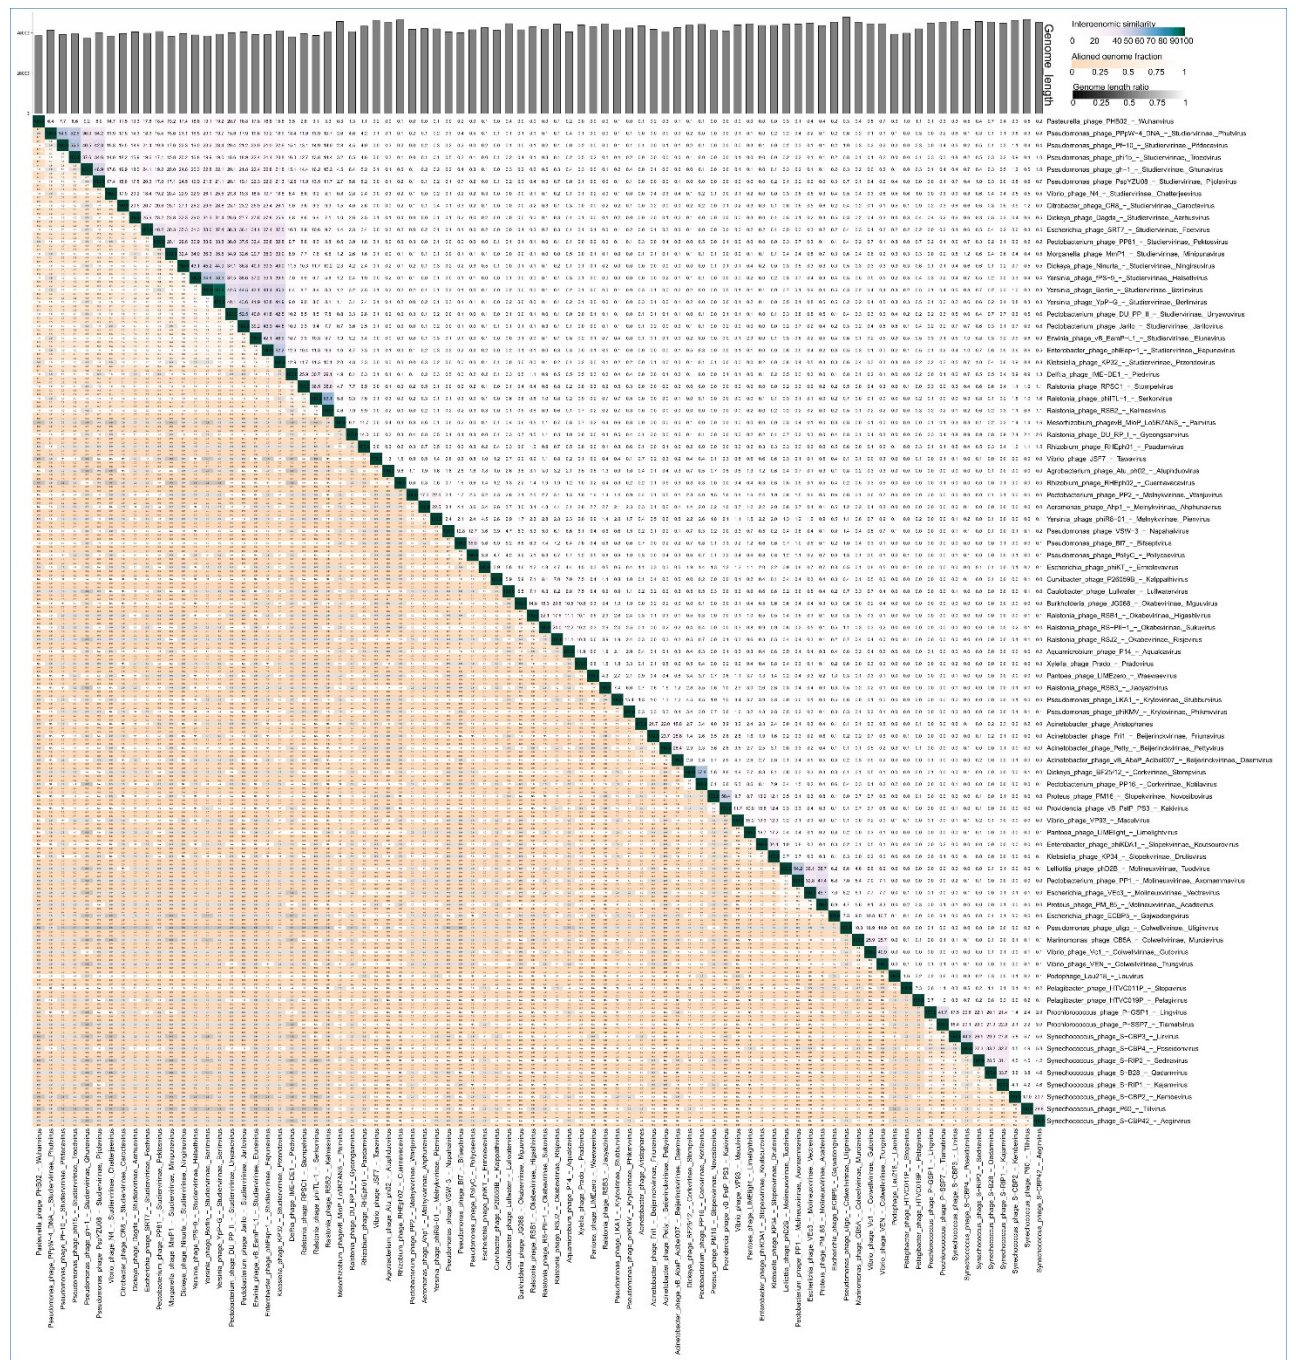

The heatmap incorporates intergenomic similarity values (right half) and alignment indicators (left half and top annotation). In the right half, the colour coding indicates the clustering of the phage genomes based on intergenomic similarity. The numbers represent the similarity values for each genome pair, rounded to the first decimal. In the left half, three indicator values are represented for each genome pair, from top to bottom: aligned fraction genome 1 (for the genome found in this row), genome length ratio (for the two genomes in this pair) and aligned fraction genome 2 (for the genome found in this column).

**Figure S2.** Best-scoring tree found by maximum likelihood (ML) search with RAXML based on amino acid sequences of terminase large subunit including representatives of all genera of the subfamily *Beijerinckvirinae* of the family *Autographiviridae*.

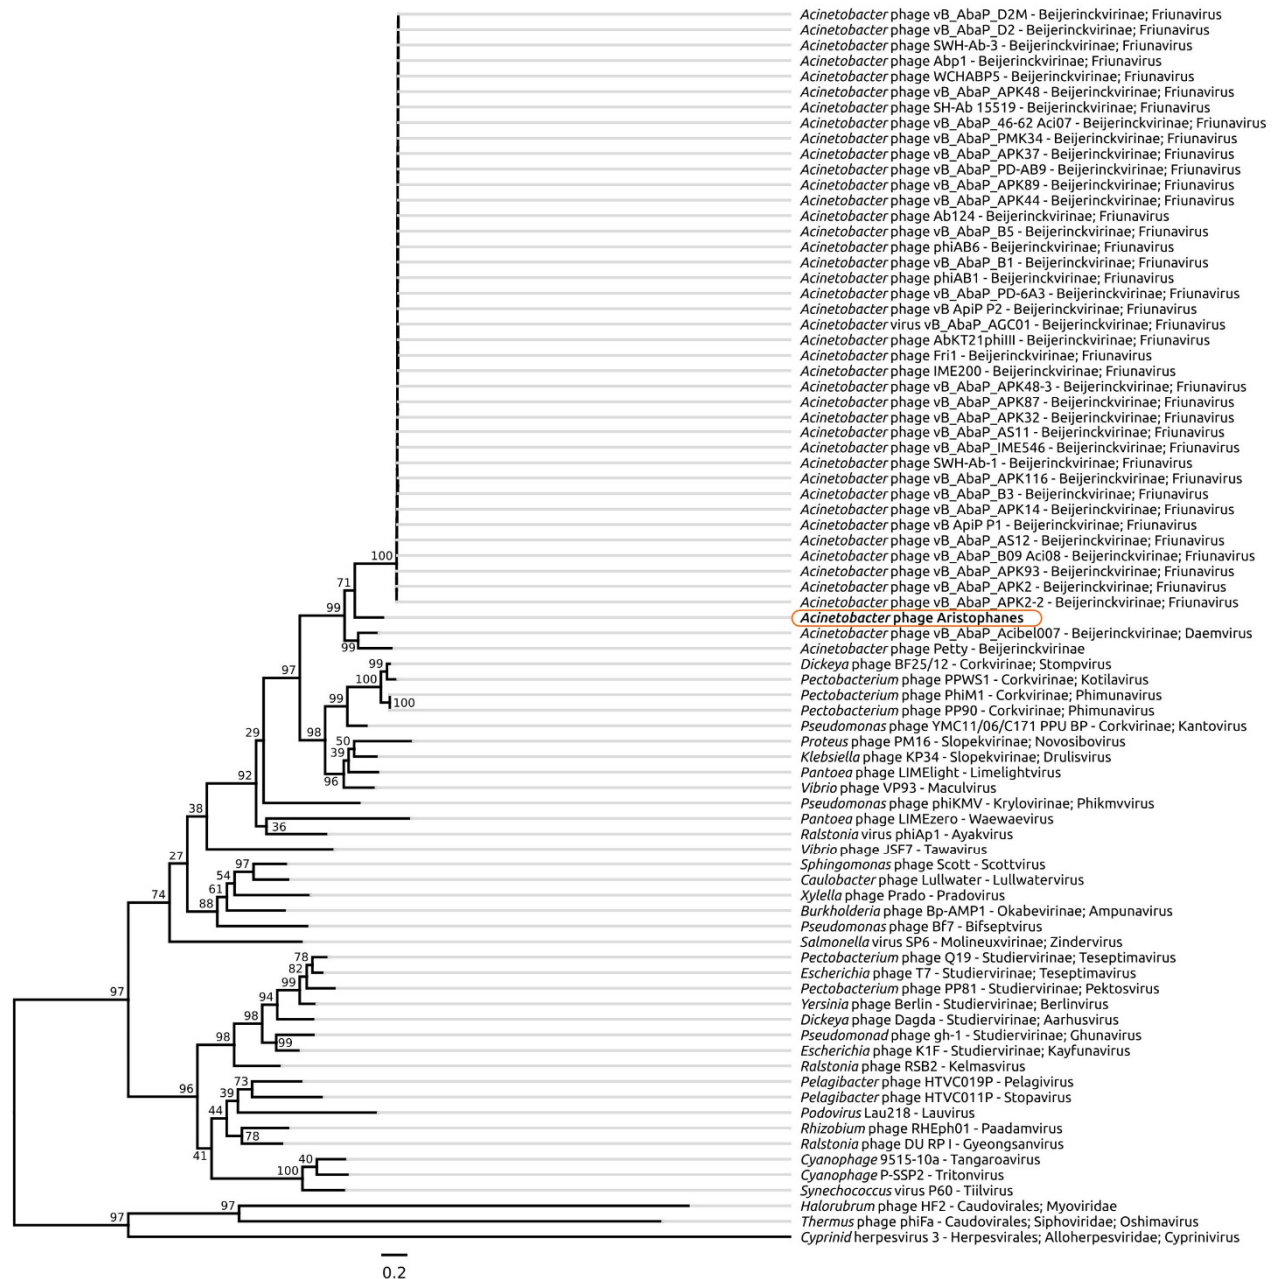

Taxonomic classification is shown to the right of the organism name. Bootstrap support values are shown above their branch as a percentage of 2000 replicates. The scale bar shows 0.2 estimated substitutions per site and the tree was rooted to *Cyprinid* herpesvirus 3, *Halorubrum* phage HF2 and *Thermus* phage phiFa.



**Table S2.** Average nucleotide identity (ANI) between *Acinetobacter* phage Aristophanes and all phage genomes deposited in the NCBI GenBank (calculated with orthoANIu, threshold 0.5).

| NCBI Accession | Organism                                      | ANI     | NCBI Taxonomy                                                                                                   |
|----------------|-----------------------------------------------|---------|-----------------------------------------------------------------------------------------------------------------|
| MT783706       | <i>Acinetobacter</i> phage Aristophanes       | 100     | <i>Autographiviridae</i> ; <i>Beijerinckvirinae</i> ; unclassified <i>Beijerinckvirinae</i>                     |
| KJ473423       | <i>Acinetobacter</i> phage vB_AbaP_Acibel007  | 66,9    | <i>Autographiviridae</i> ; <i>Beijerinckvirinae</i> ; <i>Daemvirus</i> ; <i>Acinetobacter</i> virus Acibel007   |
| MK278859       | <i>Acinetobacter</i> phage AbKT21phiIII       | 66,4214 | <i>Autographiviridae</i> ; <i>Beijerinckvirinae</i> ; <i>Friunavirus</i> ; <i>Acinetobacter</i> virus AbKT21III |
| MN294712       | <i>Acinetobacter</i> phage vB_AbaP_APK48      | 65,8857 | <i>Autographiviridae</i> ; <i>Beijerinckvirinae</i> ; <i>Friunavirus</i> ; unclassified <i>Friunavirus</i>      |
| KT388102       | <i>Acinetobacter</i> phage vB_AbaP_PD-6A3     | 65,8375 | <i>Autographiviridae</i> ; <i>Beijerinckvirinae</i> ; <i>Friunavirus</i>                                        |
| MW366784       | <i>Klebsiella</i> phage Paty                  | 65,6143 | <i>Autographiviridae</i> ; <i>Beijerinckvirinae</i> ; <i>Friunavirus</i> ; unclassified <i>Friunavirus</i>      |
| KR149290       | <i>Acinetobacter</i> phage Fri1               | 65,6125 | <i>Autographiviridae</i> ; <i>Beijerinckvirinae</i> ; <i>Friunavirus</i>                                        |
| MN856111       | <i>Myoviridae</i> sp.                         | 65,1833 | <i>Myoviridae</i>                                                                                               |
| KY268295       | <i>Acinetobacter</i> phage vB_AbaP_AS12       | 65,1667 | <i>Autographiviridae</i> ; <i>Beijerinckvirinae</i> ; <i>Friunavirus</i> ; <i>Acinetobacter</i> virus AS12      |
| MF033348       | <i>Acinetobacter</i> phage vB_AbaP_B3         | 64,9625 | <i>Autographiviridae</i> ; <i>Beijerinckvirinae</i> ; <i>Friunavirus</i> ; <i>Acinetobacter</i> virus B3        |
| MN651570       | <i>Acinetobacter</i> phage vB_AbaP_APK89      | 64,7889 | <i>Autographiviridae</i> ; <i>Beijerinckvirinae</i> ; <i>Friunavirus</i> ; unclassified <i>Friunavirus</i>      |
| MG599035       | <i>Acinetobacter</i> phage SWH-Ab-3           | 64,7778 | <i>Autographiviridae</i> ; <i>Beijerinckvirinae</i> ; <i>Friunavirus</i> ; <i>Acinetobacter</i> virus SWHAb3    |
| KY888680       | <i>Acinetobacter</i> phage WCHABP5            | 64,6667 | <i>Autographiviridae</i> ; <i>Beijerinckvirinae</i> ; <i>Friunavirus</i> ; <i>Acinetobacter</i> virus WCHABP5   |
| MW056501       | <i>Acinetobacter</i> phage vB_AbaA_fBenAci001 | 64,6222 | <i>Autographiviridae</i> ; <i>Beijerinckvirinae</i> ; <i>Friunavirus</i> ; unclassified <i>Friunavirus</i>      |
| MN604239       | <i>Acinetobacter</i> phage vB_AbaP_APK87      | 64,6    | <i>Autographiviridae</i> ; <i>Beijerinckvirinae</i> ; <i>Friunavirus</i> ; unclassified <i>Friunavirus</i>      |
| MK257722       | <i>Acinetobacter</i> phage vB_AbaP_APK32      | 64,52   | <i>Autographiviridae</i> ; <i>Beijerinckvirinae</i> ; <i>Friunavirus</i> ; unclassified <i>Friunavirus</i>      |
| MF033347       | <i>Acinetobacter</i> phage vB_AbaP_B1         | 64,45   | <i>Autographiviridae</i> ; <i>Beijerinckvirinae</i> ; <i>Friunavirus</i> ; <i>Acinetobacter</i> virus B1        |

|          |                                              |         |                                                                                           |
|----------|----------------------------------------------|---------|-------------------------------------------------------------------------------------------|
| KT804908 | <i>Acinetobacter</i> phage IME200            | 64,3556 | <i>Autographiviridae; Beijerinckvirinae; Friunavirus</i>                                  |
| MN433707 | <i>Acinetobacter</i> phage vB_AbaP_PMK34     | 64,3444 | <i>Autographiviridae; Beijerinckvirinae; Friunavirus; unclassified</i>                    |
| MN212906 | <i>Acinetobacter</i> phage vB_AbaP_D2M       | 64,3167 | <i>Friunavirus</i>                                                                        |
| MN807295 | <i>Acinetobacter</i> phage vB_AbaP_APK116    | 64,2625 | <i>Autographiviridae; Beijerinckvirinae; Friunavirus; unclassified</i>                    |
| HQ186308 | <i>Acinetobacter</i> phage phiAB1            | 64,2222 | <i>Friunavirus</i>                                                                        |
| KT388103 | <i>Acinetobacter</i> phage vB_AbaP_PD-AB9    | 64,2    | <i>Autographiviridae; Beijerinckvirinae; Friunavirus</i>                                  |
| JX658790 | <i>Acinetobacter</i> phage Abp1              | 64,19   | <i>Autographiviridae; Beijerinckvirinae; Friunavirus</i>                                  |
| MN614471 | <i>Acinetobacter</i> phage vB_AbaP_APK48-3   | 64,1667 | <i>Autographiviridae; Beijerinckvirinae; Friunavirus; unclassified</i>                    |
| KY082667 | <i>Acinetobacter</i> phage SH-Ab 15519       | 64,08   | <i>Friunavirus</i>                                                                        |
| MK474470 | <i>Vibrio</i> phage vB_VpaS_OWB              | 64      | <i>Autographiviridae; Beijerinckvirinae; Friunavirus; Acinetobacter virus SH-Ab 15519</i> |
| MN974282 | <i>Vibrio</i> phage OWB                      | 64      | <i>Autographiviridae; Maculvirus; Vibrio virus OWB</i>                                    |
| MF033349 | <i>Acinetobacter</i> phage vB_AbaP_B5        | 63,9875 | <i>Autographiviridae; Beijerinckvirinae; Friunavirus; Acinetobacter virus B5</i>          |
| MK089780 | <i>Acinetobacter</i> phage vB_AbaP_APK14     | 63,9556 | <i>Autographiviridae; Beijerinckvirinae; Friunavirus; unclassified</i>                    |
| MT741944 | <i>Acinetobacter</i> phage vB_AbaP_APK81     | 63,9556 | <i>Friunavirus</i>                                                                        |
| MW366783 | <i>Acinetobacter</i> phage Pipo              | 63,8769 | <i>Autographiviridae; Beijerinckvirinae; Friunavirus; unclassified</i>                    |
| KF669658 | <i>Acinetobacter</i> phage Presley           | 63,7    | <i>Friunavirus</i>                                                                        |
| MT633129 | <i>Acinetobacter</i> phage Ab124             | 63,7    | <i>Podoviridae</i>                                                                        |
| MF033350 | <i>Acinetobacter</i> phage vB_ApiP_P1        | 63,6444 | <i>Autographiviridae; Beijerinckvirinae; Friunavirus; unclassified</i>                    |
| MF754112 | <i>Vibrio</i> phage vB_VpaP_KF2              | 63,6    | <i>Autographiviridae; Maculvirus; Vibrio virus KF2</i>                                    |
| MH763831 | <i>Acinetobacter</i> phage vB_AbaP_B09_Aci08 | 63,4692 | <i>Autographiviridae; Beijerinckvirinae; Friunavirus; Acinetobacter virus Aci08</i>       |
| MG459218 | <i>Acinetobacter</i> phage SWH-Ab-1          | 63,4625 | <i>Autographiviridae; Beijerinckvirinae; Friunavirus; Acinetobacter virus SWHAb1</i>      |
| KC311669 | <i>Acinetobacter</i> phage AB3               | 63,4571 | <i>Autographiviridae; Beijerinckvirinae; Friunavirus</i>                                  |
| KT339321 | <i>Acinetobacter</i> phage phiAB6            | 63,4364 | <i>Autographiviridae; Beijerinckvirinae; Friunavirus; Acinetobacter virus</i>             |

|          |                                               |         |                                                                                    |
|----------|-----------------------------------------------|---------|------------------------------------------------------------------------------------|
|          |                                               |         | phiAB6                                                                             |
| MK257720 | <i>Acinetobacter</i> phage vB_AbaP_APK2-2     | 63,3778 | <i>Autographiviridae; Beijerinckvirinae; Friunavirus; unclassified Friunavirus</i> |
| MW056503 | <i>Acinetobacter</i> phage vB_AbaA_fBenAci003 | 63,3667 | <i>Autographiviridae; Beijerinckvirinae; Friunavirus; unclassified Friunavirus</i> |
| MK257719 | <i>Acinetobacter</i> phage vB_AbaP_APK2       | 63,3556 | <i>Autographiviridae; Beijerinckvirinae; Friunavirus; unclassified Friunavirus</i> |
| MN395291 | <i>Acinetobacter</i> phage vB_AbaP_IME546     | 63,3556 | <i>Autographiviridae; Beijerinckvirinae; Friunavirus; unclassified Friunavirus</i> |
| MN604238 | <i>Acinetobacter</i> phage vB_AbaP_APK44      | 63,3545 | <i>Autographiviridae; Beijerinckvirinae; Friunavirus; unclassified Friunavirus</i> |
| MH042230 | <i>Acinetobacter</i> phage vB_AbaP_D2         | 63,3125 | <i>Autographiviridae; Beijerinckvirinae; Friunavirus; Acinetobacter virus D2</i>   |
| MT263719 | <i>Acinetobacter</i> virus vB_AbaP_AGC01      | 63,28   | <i>Autographiviridae; Beijerinckvirinae; Friunavirus; unclassified Friunavirus</i> |
| MW331544 | <i>Vibrio</i> phage vB_Vc_SrVc2               | 63,2    | <i>Autographiviridae; Maculvirus; unclassified Maculvirus</i>                      |
| MK257721 | <i>Acinetobacter</i> phage vB_AbaP_APK93      | 63,1846 | <i>Autographiviridae; Beijerinckvirinae; Friunavirus; unclassified Friunavirus</i> |
| MF754111 | <i>Vibrio</i> phage vB_VpaP_KF1               | 63,1    | <i>Autographiviridae; Maculvirus; Vibrio virus KF1</i>                             |
| MG575418 | <i>Proteus</i> phage vB_PmiP_RS1pmA           | 63,1    | <i>Autographiviridae; Slopekvirinae; Novosibovirus; unclassified Novosibovirus</i> |
| MT178448 | <i>Vibrio</i> phage vB_VpP_FE11               | 63,1    | <i>Autographiviridae; Maculvirus; unclassified Maculvirus</i>                      |
| MK257723 | <i>Acinetobacter</i> phage vB_AbaP_APK37      | 62,9727 | <i>Autographiviridae; Beijerinckvirinae; Friunavirus; unclassified Friunavirus</i> |
| MF033351 | <i>Acinetobacter</i> phage vB_ApiP_P2         | 62,9333 | <i>Autographiviridae; Beijerinckvirinae; Friunavirus; Acinetobacter virus P2</i>   |
| LN610577 | <i>Pseudomonas</i> phage vB_PaeS_PAO1_Ab18    | 62,9    | <i>Siphoviridae; Abidjanvirus</i>                                                  |
| KY268296 | <i>Acinetobacter</i> phage vB_AbaP_AS11       | 62,8333 | <i>Autographiviridae; Beijerinckvirinae; Friunavirus; Acinetobacter virus AS11</i> |
| LN610585 | <i>Pseudomonas</i> phage vB_PaeS_PAO1_Ab20    | 62,8    | <i>Siphoviridae; Abidjanvirus</i>                                                  |
| HE956710 | <i>Yersinia</i> phage phi80-18                | 62,5    | <i>Autographiviridae; Melnykvirinae; Pokrovskaiavirus; Yersinia virus Phi80-18</i> |
| KM819694 | <i>Proteus</i> phage PM 75                    | 62,5    | <i>Autographiviridae; Slopekvirinae; Novosibovirus; Proteus virus PM75</i>         |

|          |                                                |         |                                                                                     |
|----------|------------------------------------------------|---------|-------------------------------------------------------------------------------------|
| MH800200 | <i>Acinetobacter</i> phage vB_AbaP_46-62_Aci07 | 62,4889 | <i>Autographiviridae; Beijerinckvirinae; Friunavirus; Acinetobacter virus Aci07</i> |
| MW056502 | <i>Acinetobacter</i> phage vB_AbaA_fBenAci002  | 62,43   | <i>Autographiviridae; Beijerinckvirinae; Friunavirus; unclassified Friunavirus</i>  |
| MG878892 | <i>Salmonella</i> phage vB_SpuP_Spp16          | 62,4    | <i>Autographiviridae; Melnykvirinae; Panjvirus; Salmonella virus Spp16</i>          |
| KF669656 | <i>Acinetobacter</i> phage Petty               | 62,3143 | <i>Autographiviridae; Beijerinckvirinae; Pettyvirus; Acinetobacter virus Petty</i>  |
| MN061582 | <i>Acinetobacter</i> phage vB_AbaP_IME546      | 62,2812 | <i>Autographiviridae; Beijerinckvirinae; Friunavirus; unclassified Friunavirus</i>  |
| KY318515 | <i>Yersinia</i> phage fHe-Yen3-01              | 62,1    | <i>Autographiviridae; Melnykvirinae; Pokrovskaiavirus; Yersinia virus fHeYen301</i> |
| MN497414 | <i>Vibrio</i> phage vB_VhaP_VH-5               | 61,9125 | <i>Autographiviridae; unclassified Autographiviridae</i>                            |
| MG575419 | <i>Proteus</i> phage vB_PmiP_RS8pmA            | 61,2    | <i>Autographiviridae; Slopekvirinae; Novosibovirus; unclassified Novosibovirus</i>  |
| KY385423 | <i>Klebsiella</i> phage vB_KpnP_KpV74          | 61,1    | <i>Autographiviridae; Slopekvirinae; Drulisvirus; Klebsiella virus KpV74</i>        |
| MT459144 | <i>Vibrio</i> phage Dax                        | 61,1    | <i>Demerecviridae; Ermolyevavirinae; Cetovirus; unclassified Cetovirus</i>          |
| JX290549 | <i>Pectobacterium</i> phage PhiM1              | 60,9    | <i>Autographiviridae; Corkvirinae; Phimunavirus; Pectobacterium virus fM1</i>       |
| MH807814 | <i>Pectobacterium</i> phage Lelidair           | 60,9    | <i>Autographiviridae; Corkvirinae; Phimunavirus; Pectobacterium virus Lelidair</i>  |
| MH807816 | <i>Pectobacterium</i> phage Momine             | 60,9    | <i>Autographiviridae; Corkvirinae; Phimunavirus; unclassified Phimunavirus</i>      |
| MK095200 | <i>Pectobacterium</i> phage Clickz_B8          | 60,9    | <i>Autographiviridae; Corkvirinae; Phimunavirus; unclassified Phimunavirus</i>      |
| MK095203 | <i>Pectobacterium</i> phage Koot               | 60,9    | <i>Autographiviridae; Corkvirinae; Phimunavirus; Pectobacterium virus Koot</i>      |
| MK095204 | <i>Pectobacterium</i> phage Koot_B1            | 60,9    | <i>Autographiviridae; Corkvirinae; Phimunavirus; unclassified Phimunavirus</i>      |
| MK095210 | <i>Pectobacterium</i> phage Zenivior           | 60,9    | <i>Autographiviridae; Corkvirinae; Phimunavirus; Pectobacterium virus Zenivior</i>  |
| MK095197 | <i>Pectobacterium</i> phage Clickz_B5          | 60,8    | <i>Autographiviridae; Corkvirinae; Phimunavirus; unclassified Phimunavirus</i>      |
| MK095206 | <i>Pectobacterium</i> phage Nobby_B2           | 60,8    | <i>Autographiviridae; Corkvirinae; Phimunavirus; unclassified Phimunavirus</i>      |
| KX237514 | <i>Klebsiella</i> phage vB_KpnP_KpV48          | 60,7    | <i>Autographiviridae; Slopekvirinae; Drulisvirus; Klebsiella virus KpV48</i>        |
| KX397280 | Phage MedPE-SWcel-C56                          | 60,7    | <i>Autographiviridae; Kafavirus; Kawavirus SWcelC56</i>                             |
| LC487410 | <i>Vibrio</i> phage KIT04                      | 60,7    | <i>Demerecviridae; Ermolyevavirinae; Cetovirus; unclassified Cetovirus</i>          |
| MK095211 | <i>Pectobacterium</i> phage Zenivior_B1        | 60,6    | <i>Autographiviridae; Corkvirinae; Phimunavirus; unclassified Phimunavirus</i>      |
| MN794000 | <i>Klebsiella</i> phage VLC1                   | 60,6    | <i>Autographiviridae; Slopekvirinae; Drulisvirus; unclassified Drulisvirus</i>      |
| MT197176 | <i>Klebsiella</i> phage VLC6                   | 60,6    | <i>Autographiviridae; Slopekvirinae; Drulisvirus; unclassified Drulisvirus</i>      |
| JQ067087 | <i>Pseudomonas</i> phage PaMx11                | 60,5    | <i>Siphoviridae; Abidjanvirus</i>                                                   |



|          |                                          |        |                                                                                                |
|----------|------------------------------------------|--------|------------------------------------------------------------------------------------------------|
| KT240186 | <i>Dickeya</i> phage BF25/12             | 60,5   | <i>Autographiviridae; Corkvirinae; Stompvirus; Dickeya virus BF25-12</i>                       |
| MN966731 | <i>Vibrio</i> phage Chazly21             | 60,5   | <i>Demereciviridae; Ermolyevavirinae; Cetovirus; unclassified Cetovirus</i>                    |
| MW344056 | <i>Vibrio</i> phage ABurr                | 60,5   | <i>Demereciviridae; Ermolyevavirinae; Cetovirus; unclassified Cetovirus</i>                    |
| HE956707 | <i>Yersinia</i> phage phiR8-01           | 60,4   | <i>Autographiviridae; Melnykvirinae; Pienvirus; Yersinia virus R8-01</i>                       |
| MN966730 | <i>Vibrio</i> phage Cilsick              | 60,4   | <i>Demereciviridae; Ermolyevavirinae; Cetovirus; unclassified Cetovirus</i>                    |
| MN966732 | <i>Vibrio</i> phage Chester              | 60,4   | <i>Demereciviridae; Ermolyevavirinae; Cetovirus; unclassified Cetovirus</i>                    |
| MT118296 | <i>Pseudomonas</i> phage Epa19           | 60,4   | <i>Siphoviridae</i>                                                                            |
| GQ413938 | <i>Klebsiella</i> phage KP34             | 60,3   | <i>Autographiviridae; Slopekvirinae; Drulisvirus</i>                                           |
| KX587949 | <i>Klebsiella</i> phage phiKpS2          | 60,2   | <i>Autographiviridae; Slopekvirinae; Drulisvirus; Klebsiella virus KpS2</i>                    |
| MK095201 | <i>Pectobacterium</i> phage Ekidair      | 60,2   | <i>Autographiviridae; Corkvirinae; Phimunavirus; unclassified Phimunavirus</i>                 |
| MN101219 | <i>Klebsiella</i> phage KOX6             | 60,2   | <i>Autographiviridae; Slopekvirinae; Drulisvirus; unclassified Drulisvirus</i>                 |
| MN101220 | <i>Klebsiella</i> phage KOX7             | 60,2   | <i>Autographiviridae; Slopekvirinae; Drulisvirus; unclassified Drulisvirus</i>                 |
| MN794001 | <i>Klebsiella</i> phage VLC2             | 60,2   | <i>Autographiviridae; Slopekvirinae; Drulisvirus; unclassified Drulisvirus</i>                 |
| MN794003 | <i>Klebsiella</i> phage VLC4             | 60,2   | <i>Autographiviridae; Slopekvirinae; Drulisvirus; unclassified Drulisvirus</i>                 |
| MK095194 | <i>Pectobacterium</i> phage Clickz_B2    | 59,9   | <i>Autographiviridae; Corkvirinae; Phimunavirus; unclassified Phimunavirus</i>                 |
| MT259468 | <i>Aeromonas</i> phage PS                | 59,9   | <i>Autographiviridae; unclassified Autographiviridae</i>                                       |
| KY684082 | <i>Shigella</i> phage SFN6B              | 59,8   | <i>Autographiviridae; Slopekvirinae; Drulisvirus; Shigella virus SFN6B</i>                     |
| MG649966 | <i>Vibrio</i> phage Ceto                 | 59,8   | <i>Demereciviridae; Ermolyevavirinae; Cetovirus</i>                                            |
| MK693005 | <i>Klebsiella</i> phage KPR2             | 59,8   | <i>Autographiviridae; Slopekvirinae; Drulisvirus; unclassified Drulisvirus</i>                 |
| MT682065 | <i>Klebsiella</i> virus KpV2883          | 59,8   | <i>Autographiviridae; Slopekvirinae; Drulisvirus; unclassified Drulisvirus</i>                 |
| MT701589 | <i>Klebsiella</i> phage Pone             | 59,8   | <i>Autographiviridae; Slopekvirinae; Drulisvirus; unclassified Drulisvirus</i>                 |
| MW358930 | <i>Providencia</i> phage PSTRCR_114      | 59,725 | <i>Autographiviridae; Kakivirus</i>                                                            |
| KT367886 | <i>Klebsiella</i> phage Kp2              | 59,7   | <i>Autographiviridae; Slopekvirinae; Drulisvirus</i>                                           |
| KY000081 | <i>Klebsiella</i> phage KPV811           | 59,7   | <i>Autographiviridae; Slopekvirinae; Drulisvirus; Klebsiella virus KPV811</i>                  |
| MK095195 | <i>Pectobacterium</i> phage Clickz_B3    | 59,7   | <i>Autographiviridae; Corkvirinae; Phimunavirus; unclassified Phimunavirus</i>                 |
| MN101217 | <i>Klebsiella</i> phage KOX4             | 59,7   | <i>Autographiviridae; Slopekvirinae; Drulisvirus; unclassified Drulisvirus</i>                 |
| MN380459 | <i>Klebsiella</i> phage vB_KpnP_fHeKpn01 | 59,7   | <i>Autographiviridae; Slopekvirinae; Drulisvirus; unclassified Drulisvirus</i>                 |
| KT345706 | <i>Vibrio</i> phage vB_VorS-PVo5         | 59,6   | <i>Demereciviridae; Ermolyevavirinae; Cetovirus; unclassified Cetovirus</i>                    |
| MK838107 | <i>Aeromonas</i> phage LAh1              | 59,5   | <i>Autographiviridae; Melnykvirinae; Ahphunavirus; unclassified Ahphunavirus</i>               |
| MK838108 | <i>Aeromonas</i> phage LAh2              | 59,5   | <i>Autographiviridae; Melnykvirinae Melnykvirinae; Ahphunavirus; unclassified Ahphunavirus</i> |
| MK838109 | <i>Aeromonas</i> phage LAh3              | 59,5   | <i>Autographiviridae; Melnykvirinae; Ahphunavirus; unclassified</i>                            |

|          |                                                |       |                                                                                                          |
|----------|------------------------------------------------|-------|----------------------------------------------------------------------------------------------------------|
|          |                                                |       | <i>Ahphunavirus</i>                                                                                      |
| MK838110 | <i>Aeromonas</i> phage LAh4                    | 59,5  | <i>Autographiviridae</i> ; <i>Melnykvirinae</i> ; <i>Ahphunavirus</i> ; unclassified <i>Ahphunavirus</i> |
| MK838111 | <i>Aeromonas</i> phage LAh5                    | 59,5  | <i>Autographiviridae</i> ; <i>Melnykvirinae</i> ; <i>Ahphunavirus</i> ; unclassified <i>Ahphunavirus</i> |
| MT197175 | <i>Klebsiella</i> phage VLC5                   | 59,5  | <i>Autographiviridae</i> ; <i>Slopekvirinae</i> ; <i>Drulisvirus</i> ; unclassified <i>Drulisvirus</i>   |
| MK387869 | <i>Providencia</i> phage vB PstP PS3           | 59,25 | <i>Autographiviridae</i> ; <i>Kakivirus</i> ; <i>Providencia</i> virus PS3                               |
| KU666550 | <i>Klebsiella</i> phage KpV71                  | 59,2  | <i>Autographiviridae</i> ; <i>Slopekvirinae</i> ; <i>Drulisvirus</i>                                     |
| MN176573 | <i>Klebsiella</i> phage vB_KpnP_IME337         | 59,2  | <i>Autographiviridae</i> ; <i>Slopekvirinae</i> ; <i>Drulisvirus</i> ; unclassified <i>Drulisvirus</i>   |
| MT939252 | <i>Klebsiella</i> phage vB_KpnP_Dlv622         | 59,2  | <i>Autographiviridae</i> ; <i>Slopekvirinae</i> ; <i>Drulisvirus</i> ; unclassified <i>Drulisvirus</i>   |
| KF319020 | <i>Proteus</i> phage PM16                      | 59    | <i>Autographiviridae</i> ; <i>Slopekvirinae</i> ; <i>Novosibovirus</i> ; <i>Proteus</i> virus PM16       |
| LC375533 | <i>Pectobacterium</i> phage PPWS2              | 58,8  | <i>Autographiviridae</i> ; <i>Corkvirinae</i> ; <i>Kotilavirus</i> ; <i>Pectobacterium</i> virus PPWS2   |
| MT460517 | <i>Vibrio</i> phage Athena                     | 58,8  | <i>Demerecviridae</i> ; <i>Ermolyevavirinae</i> ; <i>Cetovirus</i> ; unclassified <i>Cetovirus</i>       |
| MK962640 | <i>Achromobacter</i> phage vB_AxyP_19-32_Axy23 | 58,7  | <i>Autographiviridae</i> ; unclassified <i>Autographiviridae</i>                                         |
| JQ340389 | <i>Vibrio</i> phage pVp-1                      | 58,6  | <i>Demerecviridae</i> ; <i>Ermolyevavirinae</i> ; <i>Vipunavirus</i> ; <i>Vibrio</i> virus pVp1          |
| MK895508 | <i>Vibrio</i> phage Brizo                      | 58,6  | <i>Demerecviridae</i> ; <i>Ermolyevavirinae</i> ; <i>Cetovirus</i> ; unclassified <i>Cetovirus</i>       |
| MK907780 | <i>Vibrio</i> phage Pontus                     | 58,6  | <i>Demerecviridae</i> ; <i>Ermolyevavirinae</i> ; <i>Cetovirus</i> ; unclassified <i>Cetovirus</i>       |
| MW344055 | <i>Vibrio</i> phage GRLPWR                     | 58,6  | <i>Demerecviridae</i> ; <i>Ermolyevavirinae</i> ; <i>Cetovirus</i> ; unclassified <i>Cetovirus</i>       |
| MN958086 | <i>Vibrio</i> phage Bennett                    | 58,5  | <i>Demerecviridae</i> ; <i>Ermolyevavirinae</i> ; <i>Cetovirus</i> ; unclassified <i>Cetovirus</i>       |
| MT448616 | <i>Vibrio</i> phage BBMuffin                   | 58,5  | <i>Demerecviridae</i> ; <i>Ermolyevavirinae</i> ; <i>Cetovirus</i> ; unclassified <i>Cetovirus</i>       |
| MG649967 | <i>Vibrio</i> phage Thalassa                   | 58,4  | <i>Demerecviridae</i> ; <i>Ermolyevavirinae</i> ; <i>Cetovirus</i>                                       |
| MH179473 | <i>Aeromonas</i> phage 25AhydR2PP              | 58,3  | <i>Autographiviridae</i> ; <i>Melnykvirinae</i> ; <i>Aerosvirus</i> ; <i>Aeromonas</i> virus 25AhydR2PP  |
| MT108725 | <i>Pseudomonas</i> phage Epa5                  | 58,3  | <i>Siphoviridae</i>                                                                                      |
| FN594518 | <i>Pseudomonas</i> phage phi-2                 | 58,2  | <i>Autographiviridae</i> ; <i>Krylovirinae</i> ; <i>Tunggulviirus</i> ; <i>Pseudomonas</i> virus f2      |
| FR687252 | <i>Pantoea</i> phage LIMelight                 | 58,2  | <i>Autographiviridae</i> ; <i>Limelightvirus</i>                                                         |
| MN844877 | <i>Sphaerotilus</i> phage vB_SnaP-R1           | 58    | <i>Autographiviridae</i> ; unclassified <i>Autographiviridae</i>                                         |
| KU197013 | <i>Xanthomonas</i> phage XAJ24                 | 57,9  | <i>Autographiviridae</i> ; <i>Pradovirus</i> ; <i>Xanthomonas</i> virus XAJ24                            |
| MK962628 | <i>Achromobacter</i> phage vB_AxyP_19-32_Axy09 | 57,9  | <i>Autographiviridae</i> ; unclassified <i>Autographiviridae</i>                                         |
| MW286266 | <i>Pseudomonas</i> phage Bertil                | 57,9  | <i>Autographiviridae</i> ; unclassified <i>Autographiviridae</i>                                         |
| MW286268 | <i>Pseudomonas</i> phage Strit                 | 57,9  | <i>Autographiviridae</i> ; unclassified <i>Autographiviridae</i>                                         |

|          |                                                |      |                                                                                                           |
|----------|------------------------------------------------|------|-----------------------------------------------------------------------------------------------------------|
| MN399336 | <i>Edwardsiella</i> phage vB_EtaM_ET-ABTNL-9   | 57,7 | <i>Myoviridae</i>                                                                                         |
| MK962638 | <i>Achromobacter</i> phage vB_AxyP_19-32_Axy21 | 57,6 | <i>Autographiviridae</i> ; unclassified <i>Autographiviridae</i>                                          |
| MW286267 | <i>Pseudomonas</i> phage Misse                 | 57,5 | <i>Autographiviridae</i> ; unclassified <i>Autographiviridae</i>                                          |
| MT460515 | <i>Vibrio</i> phage Cody                       | 57,3 | <i>Demerecviridae</i> ; <i>Ermolyevavirinae</i> ; <i>Cetovirus</i> ; unclassified <i>Cetovirus</i>        |
| JN651747 | <i>Aeromonas</i> phage phiAS7                  | 57,1 | <i>Autographiviridae</i> ; <i>Melnykvirinae</i> ; <i>Aerosvirus</i> ; <i>Aeromonas</i> virus AS7          |
| KR054031 | <i>Pseudomonas</i> phage DL62                  | 57,1 | <i>Autographiviridae</i> ; <i>Krylovirinae</i> ; <i>Phikmvvirus</i> ; <i>Pseudomonas</i> virus DL62       |
| MH992513 | <i>Aeromonas</i> phage ZPAH7                   | 56,8 | <i>Autographiviridae</i> ; <i>Melnykvirinae</i> ; <i>Aerosvirus</i> ; <i>Aeromonas</i> virus ZPAH7        |
| MK330684 | <i>Aeromonas</i> phage ZPAH7B                  | 56,8 | <i>Autographiviridae</i> ; <i>Melnykvirinae</i> ; <i>Aerosvirus</i> ; <i>Aeromonas</i> virus ZPAH7        |
| MT104471 | <i>Pseudomonas</i> phage MR8                   | 56,8 | <i>Autographiviridae</i> ; <i>Krylovirinae</i>                                                            |
| MT104472 | <i>Pseudomonas</i> phage MR12                  | 56,8 | <i>Autographiviridae</i> ; <i>Krylovirinae</i>                                                            |
| MT104477 | <i>Pseudomonas</i> phage MR18                  | 56,8 | <i>Autographiviridae</i> ; <i>Krylovirinae</i>                                                            |
| MN871483 | <i>Pseudomonas</i> phage PaSz-8_45_42k         | 56,7 | <i>Autographiviridae</i> ; <i>Krylovirinae</i> ; <i>Phikmvvirus</i> ; unclassified <i>Phikmvvirus</i>     |
| EU056923 | <i>Pseudomonas</i> phage PT5                   | 56,6 | <i>Autographiviridae</i> ; <i>Krylovirinae</i> ; <i>Phikmvvirus</i> ; <i>Pseudomonas</i> virus PT5        |
| JQ307386 | <i>Pseudomonas</i> phage vB_Pae-TbilisiM32     | 56,6 | <i>Autographiviridae</i> ; <i>Krylovirinae</i> ; <i>Phikmvvirus</i> ; unclassified <i>Phikmvvirus</i>     |
| KX711710 | <i>Pseudomonas</i> phage vB_Pae-TbilisiM32     | 56,6 | <i>Autographiviridae</i> ; <i>Krylovirinae</i> ; <i>Phikmvvirus</i> ; unclassified <i>Phikmvvirus</i>     |
| MK053931 | <i>Pectobacterium</i> phage Arno160            | 56,6 | <i>Autographiviridae</i> ; <i>Melnykvirinae</i> ; <i>Wanjuvirus</i> ; <i>Pectobacterium</i> virus Arno160 |
| MT104470 | <i>Pseudomonas</i> phage MR7                   | 56,6 | <i>Autographiviridae</i> ; <i>Krylovirinae</i>                                                            |
| MG592574 | <i>Vibrio</i> phage 1.204.O_10N.222.46.F12     | 56,3 | <i>Autographiviridae</i> ; <i>Cyclitvirus</i> ; <i>Vibrio</i> virus <i>Cyclit</i>                         |
| AM265639 | <i>Pseudomonas</i> phage LKA1                  | 56,1 | <i>Autographiviridae</i> ; <i>Krylovirinae</i> ; <i>Stubburvirus</i>                                      |
| EU236438 | <i>Pseudomonas</i> phage PT2                   | 56,1 | <i>Autographiviridae</i> ; <i>Krylovirinae</i> ; <i>Phikmvvirus</i> ; <i>Pseudomonas</i> virus PT2        |
| KC969441 | <i>Pseudomonas</i> phage MBL                   | 56,1 | <i>Autographiviridae</i> ; <i>Krylovirinae</i> ; <i>Phikmvvirus</i> ; unclassified <i>Phikmvvirus</i>     |
| MN553585 | <i>Pseudomonas</i> phage 4phiC20-1             | 56,1 | <i>Autographiviridae</i> ; <i>Krylovirinae</i> ; <i>Phikmvvirus</i> ; unclassified <i>Phikmvvirus</i>     |
| MN553587 | <i>Pseudomonas</i> phage phiKMVC5-121          | 56,1 | <i>Autographiviridae</i> ; <i>Krylovirinae</i> ; <i>Phikmvvirus</i> ; unclassified <i>Phikmvvirus</i>     |
| MN553589 | <i>Pseudomonas</i> phage phiKMVC5-121          | 56,1 | <i>Autographiviridae</i> ; <i>Krylovirinae</i> ; <i>Phikmvvirus</i> ; unclassified <i>Phikmvvirus</i>     |
| MN615699 | <i>Pseudomonas</i> phage vB_PaeP_SPCG          | 56,1 | <i>Autographiviridae</i> ; <i>Krylovirinae</i> ; <i>Phikmvvirus</i> ; unclassified <i>Phikmvvirus</i>     |
| KT381879 | <i>Caulobacter</i> phage Percy                 | 56   | <i>Autographiviridae</i> ; <i>Percyvirus</i> ; <i>Caulobacter</i> virus Percy                             |
| MK903278 | <i>Xanthomonas</i> phage Pagan                 | 55,6 | <i>Autographiviridae</i> ; <i>Pradovirus</i> ; unclassified <i>Pradovirus</i>                             |
| MH746814 | <i>Acinetobacter</i> phage vB_AbaM_B09_Aci05   | 55,3 | <i>Myoviridae</i> ; <i>Saclayvirus</i> ; <i>Acinetobacter</i> virus Aci05                                 |
| MN855912 | <i>Siphoviridae</i> sp.                        | 55,2 | <i>Siphoviridae</i>                                                                                       |

|          |                                   |      |                                                          |
|----------|-----------------------------------|------|----------------------------------------------------------|
| MK170160 | <i>Acinetobacter</i> phage TAC1   | 55,1 | <i>Myoviridae; Saclayvirus; unclassified Saclayvirus</i> |
| MT623546 | <i>Acinetobacter</i> phage Ab 121 | 53,9 | <i>Myoviridae; Saclayvirus; unclassified Saclayvirus</i> |
